# Supplementary material
Source: Springer Nature journal article supplement (https://www.springermedizin.de/resource/supplementary/12888_2013_1305_MOESM2_ESM.pdf/9479826)

# Trend in Proportion of Capacity Assessments

Inpatients who had capacity assessments (%)

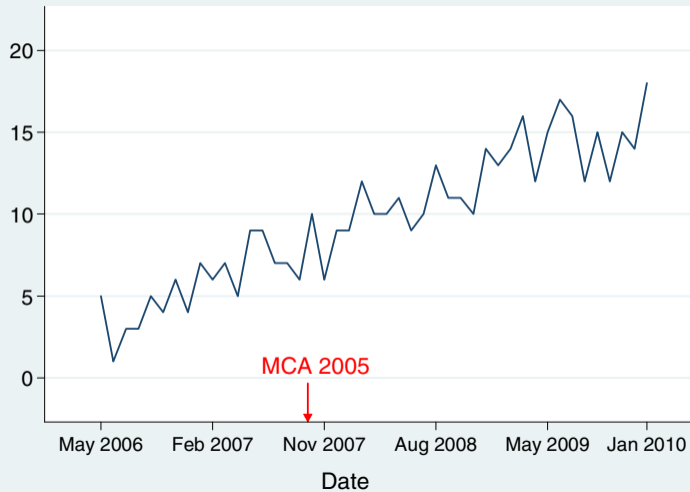

Supplement: MOESM2 [file 9479826]
